1           **Socio-demographic correlate of knowledge and practice toward novel**  
2           **coronavirus among people living in Mosul-Iraq: A cross-sectional study**  
3

4  
5   **Balsam Qubais Saeed<sup>1,2\*</sup>, Rula Al-Shahrabi<sup>2</sup>, Obasanjo Afolabi Bolarinwa<sup>3</sup>**

6   <sup>1</sup>Department of Clinical Sciences, College of Medicine, University of Sharjah, P.O. Box 27272,  
7   Sharjah, UAE. E-mail; [bsaeed@sharjah.ac.ae](mailto:bsaeed@sharjah.ac.ae)

8   <sup>2</sup>Sharjah Institute for Medical Research, University of Sharjah, P.O. Box 27272, Sharjah, UAE.  
9   E-mail; [ph.rulaali@gmail.com](mailto:ph.rulaali@gmail.com)

10   <sup>3</sup>Department of Public Health Medicine, School of Nursing and Public Health, University of  
11   KwaZulu-Natal, Durban, South Africa. E-mail; [bolarinwaobasanjo@gmail.com](mailto:bolarinwaobasanjo@gmail.com)

12   ORCID - <https://orcid.org/0000-0002-9208-6408>

13  
14  
15  
16  
17  
18   **\*Correspondence:** Balsam Qubais Saeed, email: [bsaeed@sharjah.ac.ae](mailto:bsaeed@sharjah.ac.ae) , Tel: 00971605057235

26 **ABSTRACT**

27 **Background:** Since the World Health Organization (WHO) announced that the 2019 novel  
28 coronavirus (2019-nCoV) is a worldwide pandemic, as the Iraqi authorities have started  
29 responding and taking action to control the spread of the pandemic. The knowledge and practices  
30 of the public play an important role in curbing the spreading of the virus by following the health  
31 guidelines. This study aimed to assess the socio-demographic correlate of knowledge and  
32 practices of Iraqi living in Mosul-Iraq towards novel coronavirus during its rapid rise.

33 **Methods:** A cross-sectional online survey of 909 participants was conducted among Mosul-Iraq  
34 between 20<sup>th</sup> June to 1<sup>st</sup> July 2020. The survey included three parts: 1) socio-demographic  
35 characteristics, 2) participants' knowledge, 3) participants' practices. T-test, ANOVA, chi-square,  
36 and binary logistic regression were used. A p-value less than 0.05 ( $p < 0.05$ ) was considered  
37 statistically significant.

38 **Results:** The results showed knowledge and practice mean score of  $(12.91 \pm 1.67)$  and  $(21.56 \pm$   
39  $2.92)$  with cumulative knowledge and practice of 86% and 76% respectively towards 2019-  
40 nCoV. Socio-demographic characteristics such as age, marital status, gender, level of education  
41 and employment were statistically related with a higher mean score of knowledge and practice  
42 towards the virus as  $P < 0.05$ .

43 **Conclusions:** We concluded that the majority of the respondents demonstrate a high level of  
44 knowledge and practices towards 2019-nCoV except respondents with socio-demographic  
45 characteristics such as those who were younger, male respondents, those with lower education  
46 and those unemployed as such campaigns that will increase the knowledge and encourage  
47 adequate preventive practice towards 2019-nCoV should be targeted towards this group.

48 **KEYWORDS:** Knowledge, Practice, Novel coronavirus, Mosul, Iraq

49

## 50 **1. INTRODUCTION**

51 On 31<sup>st</sup> December 2019, the novel coronavirus detected in Wuhan, China, on 11-March 2020,  
52 has been considered as a global pandemic by the (WHO), at the end of April, the virus has spread  
53 worldwide with fear-evoking death reports (1, 2).

54 The 2019 novel coronavirus (2019-nCoV) is highly contagious; it causes a respiratory illness that  
55 ranges from the common cold-like symptoms to more severe diseases (2). Most of the infected  
56 patients complaining from fever, shortness in breath, cough, loss of smell, and/or taste sensation  
57 and might be infected asymptotically. In severe cases, patients might suffer from pneumonia,  
58 multiple organ dysfunction, and death. (3, 4).

59 The 2019-nCoV is a novel strain that is not specified in humans earlier, and it is a zoonotic  
60 illness that is transmitted between animals and people and may infect humans and animals. (5).

61 In Iraq, the first case of novel coronavirus was confirmed on 24<sup>th</sup> -February-2020 in Al-Najaf  
62 city by people who have visited Iran. Therefore, at the end of March 13-2020, the Ministry of  
63 Health and Environment of Iraq declared that the total of confirmed cases of coronavirus is  
64 101(6). The ministry of health (MOH) in Iraq started to respond and take action to control the  
65 infection, as well as the technical observation of (WHO), three governmental biological  
66 laboratories in Baghdad, Basrah, and Erbil, were opened for COVID-19 outbreak testing. (7).  
67 Initially, the measures that were taken by the Iraqi authorities nationwide have succeeded in  
68 managing to slow the spread of the virus, but the cases have risen sharply in the past two months.  
69 In the first week of August, Mosul city recorded thirty times increased in novel coronavirus cases

70 reported compared to the previous months, while the reported national cases rose from 10,000 to  
71 120,000 across the country (8).

72 Due to the escalating number of cases in Mosul city, many challenges were observed while  
73 trying to stop the virus from spreading, the limited number of tests that can be carried out per  
74 day, lack of quarantine facilities, medical instrument, hygienic preparation insufficiency, low  
75 hospital capacities, and no approved medicine or vaccine to prevent the 2019 n-CoV. Therefore,  
76 the preventive measures taken by the people are important to protect themselves and others from  
77 the virus infection and control the spread of the disease (9). Thus, managing this crisis hangs  
78 primarily on people's knowledge and practices toward this virus and following all the  
79 precautions to prevent cross-infection and follow guidelines of the World Health Organization  
80 (WHO) and the Center for Disease Control and Prevention (CDC) (10, 11 ).

81 World Health Organization (WHO) declared precautional strategies to curb the spreading of  
82 infections. The none medical precautions are maintaining social distancing, avoid public  
83 gathering, avoid direct contact with infected people and use of personal protective equipment  
84 (PPE) like face masks. Also, personal hygiene recommendations such as hand-washing often  
85 with soap and water for at least 20 seconds, especially after touching surfaces, don't touch the  
86 nose, eyes, and mouth with unwashed hands, and self-isolate when 2019-nCoV symptoms started  
87 (10).

88 The knowledge and practices of the public toward 2019 novel coronavirus play an important role  
89 in determining the willingness of Iraqi citizens to change their behavior and identify the kind of  
90 intervention that is needed to correct the misconceptions regarding the virus, highlight the poor  
91 knowledge toward the virus and disease, development of new preventive measures, develop  
92 COVID-19 awareness campaign, and take precautionary. Therefore, the current study aimed to

93 assess the socio-demographic correlate of knowledge and practices of Iraqi in Mosul towards  
94 2019 novel coronavirus during its rapid rise.

95 The results of this study are expected to provide baseline information about the level of  
96 knowledge and practices of Iraqi living in Mosul and highlight misperceptions related to  
97 preventive measures. The outcomes of the study will further hence better planning for effective  
98 awareness campaigns, required interventions and taking the appropriate action from local  
99 authorities.

## 100 **1. MATERIAL AND METHODS**

### 101 **Study design**

102 A cross-sectional survey was adopted for the study using an online google form platform. The  
103 invitation of the respondents (Mosul-Iraqi) to participate in the survey was made on social media  
104 using the most popular media in Iraq, the social media messenger applications such as;  
105 WhatsApp and Facebook messengers were used in distributing the online google based  
106 questionnaire and participation was limited to Mosul-Iraqi 18 years and above.

### 107 **Study Settings**

108 Mosul is located in Nineveh Governorate - Iraq, has a population of 3.5 million. Residents of  
109 Mosul city suffer from a fragile health system that barely meets their basic needs, as many health  
110 facilities were destroyed in 2017 (8).

### 111 **Survey and data collection**

112 A total of 909 Mosul-Iraqi participated in our study between 20th June to 1st July 2020. The  
113 specified Sample size was by determining the lowest acceptable size of a demographic subgroup  
114 with a  $\pm 5\%$  margin of error and a confidence level of 95% (12, 13). Giving to this, out of the

115 total respondents of 1121 who filled the online google based questionnaire, only 909 were  
116 included. An incomplete survey of participants of 212 was excluded from the study, leaving us  
117 with a completion rate of 81%.

118 The survey was an adapted version of questionnaires published previously (14, 15,16). The  
119 survey was reviewed, and pilot tested by 21 Iraqi people and 3 faculty experts at the University  
120 of Mosul using WhatsApp and telephone interviews to correct any question then sent it to the  
121 target population. The survey consisted of an interface page and three main themes, with a total  
122 of 37 questions. The interface page included the title, objective of the study, information on  
123 participants' privacy, and instructions to fill the survey. The three main themes included: 1)  
124 demographic information of participants such as gender, age, education level, marital status,  
125 employment status, coronavirus test, coronavirus result and Chronic diseases; 2) Knowledge  
126 related the 2019 novel coronavirus consisted of 15 questions divided to clinical presentations of  
127 virus (K1-K5), the spread of the virus (K6-K9) prevention (K10-K12) and the risk factors (K13-  
128 K15); 3) practices of participants toward novel coronavirus outbreak, which included 13  
129 questions. The google based questionnaire was designed in Arabic to encourage adequate  
130 participation of the respondents since Arabic is the common language in Mosul city.

### 131 **Ethical approval**

132 The Research Ethics Committee (RIC) at the University of Sharjah, UAE approved this study by  
133 the reference number is REC- 20-05-31-01, as of 14/06/2020.

### 134 **Data and statistical analysis**

135 Data analysis conducted using Statistical Package for Social Software (SPSS) version 22. Scale  
136 reliability was performed to ensure data consistency (Cronbach's alpha coefficient = 0.729),  
137 indicating good consistency. The frequencies of demographic characteristics, knowledge, and

138 practice answers along with descriptive statistics, were presented in mean  $\pm$  SD, while qualitative  
139 data were presented in frequency (number\percent). Participants' knowledge and practice scores  
140 were compared with demographics factors using independent- samples t-test, one-way analysis  
141 of variance (ANOVA).

142 To measure the knowledge, participants were given "yes," "no," and "not sure" answer options  
143 to each survey question. A true answer to each question was marked with 1 score, while false  
144 answers and not sure were marked with 0 scores. Scores of total knowledge ranged from 0-15; a  
145 higher score signals a better level of knowledge. To practice measures, participants were given  
146 "always", "sometimes", and " never" answer options to each item; the always option was marked  
147 for 2 scores, while sometimes was for 1 score, and rarely was for 0 scores. The total practice  
148 scores ranged from 0-26. The lowest and highest score of participants' knowledge was 7 and 15,  
149 respectively, while the lowest and highest score of practice was 14 and 26, respectively.

150 Pearson's chi-square was used to determine the association between the explanatory and  
151 outcome variables. We examined the factors associated with good knowledge & practice and  
152 poor knowledge & practices by using binary logistic regression analyses. A p-value of less than  
153 0.05 ( $p < 0.05$ ) was considered statistically significant.

154 To identify the factors that were significantly associated with good or poor knowledge and  
155 practices, a mean knowledge score of more than 12 indicated as good knowledge, while less than  
156 12 assigned as poor. Similarly, a mean practice score above 21 indicated as good practice and a  
157 mean practice score below 21 as poor practice. Factors were selected with a backward stepwise  
158 method, and the reference category was selected based on the higher total mean. Unstandardized  
159 regression coefficients ( $\beta$ ) and odds ratios (ORs) and their 95% confidence intervals (CIs) were  
160 used to quantify the associations between cofactors with knowledge and practice.

## 161 **2. RESULTS**

### 162 **Socio-demographic characteristics**

163 The results showed that the majority of 61.4% were females, and 38.6% were males. More  
164 than half of the participants, 54.5%, aged 30-49 years. Around 60.5% of respondents were  
165 married, while 31.7% and 7.9% were single, and others (divorced and widows), respectively.  
166 About 62.4% were holding a bachelor's degree, while 25.7, 11.9% were holding postgraduates  
167 and diploma or below, respectively. Moreover, almost 64.5% were employed, while a smaller  
168 number of participants, 21.8%, 13.9%, were unemployed and students, respectively. Some of the  
169 participants, 7.9%, have been tested for COVID-19, while 92.1% didn't do the COVID-19 est.  
170 However, 1.5% of tested respondents were positive, and 98.5% of the participants have been  
171 negative tests. Figure 1 summarized the frequency of respondents according to demographic  
172 characteristics.

### 173 **Prevalence of chronic diseases reported by Iraqi participants**

174  
175  
176 In our study, 82.4% of the participants were healthy, while 17.6% had chronic diseases. The  
177 most common chronic diseases were diabetes 6%, followed by asthma at 3.30%. Moreover,  
178 2.75%, 2.40%, 1.54%, 1.54%, 1.20% had chronic kidney disease, severe obesity, heart  
179 conditions, chronic liver disease, and chronic lung diseases, respectively, as shown in Figure 2.

### 180 **Knowledge towards novel coronavirus**

181 The mean knowledge score ( $\pm$ SD) of 15 questions was (12.91 $\pm$ 1.67). The correct percentage rate  
182 was 86.08%. Most of the participants, 92.1%, answered correctly that novel coronavirus caused  
183 by a virus; the majority, 94.1%, knew that the incubation period range of this virus is between 2-  
184 14 days. Almost all participants had a high knowledge of 96% about the symptoms of a  
185 novel coronavirus; about 72.3% of respondents knew that no vaccine toward this virus.



186 Moreover, 63.4% knew that no treatment was approved toward novel coronavirus until now.  
187 When we asked if this virus is spread via respiratory droplets of infected people, 93.1%  
188 answered correctly.

189 Similarly, A high proportion of 93.1% of the participants agreed that the virus could be  
190 transmitted via touching contaminated surfaces. Also, 82.2% indicated that this virus was  
191 transmitted through the eyes, nose, and mouth. Just over half, 59.4%, reported that the infected  
192 person having no fever could infect healthy people and the majority of participants, 94.1%  
193 recorded that children and young adults have to take measures toward novel coronavirus.

194 About 76.2% of respondents reported the individuals should stay at home and go out only when  
195 necessary, while all of the participants 100% agreed that they should avoid going to crowded  
196 places, and the infected person with this virus should be immediately isolated in a proper place.  
197 Most of the respondents, 96%, answered that the virus is more dangerous for those with chronic  
198 disease patients and the elderly, while 79.2% believed that smokers are more vulnerable to this  
199 virus. The knowledge of participants toward novel coronavirus is displayed in **Table 1**.

## 200 **Practice towards novel coronavirus**

201 The mean practice score ( $\pm$ SD) of 13 questions was (21.56 $\pm$  2.92). The correct percentage rate  
202 was 75.8%. We found that 92.1% of the participants started washing their hands frequently  
203 during a novel coronavirus period. Similarly, 92.1% indicated they were used sanitizer if the  
204 soap is not available, while usual handwashing with soap for 20 seconds was recorded by 77.2%  
205 of respondents. Almost 83.2% of participants wearied a mask when they go outside the home.  
206 Three-quarters, 72.3% of respondents maintain space between them and others when going  
207 outside, and only 36.6% maintain the 2-meter distance between them and others to prevent  
208 transmission of the virus.

209 About 88% of the Iraqi respondents stopped going to crowded places recently. However, two-  
210 thirds of the respondents, 69.3% and 65.3%, reported that they stopped visiting and kissing their  
211 relatives or friends when meeting them, while 77.2% stopped the handshake during the greeting  
212 with others. Besides, 81.2% were aware of the essential of sanitizing their hands after using cash,  
213 and 75.2% of participants were aware of the importance of avoiding sharing their food with  
214 others. The participant's practices toward novel coronavirus prevention presented in Table 2.

### 215 **Sources of information on COVID-19**

216 Participants indicated that the Ministry of Health and Environment in Iraq (MOH) and social  
217 media such as Twitter, Facebook, YouTube, WhatsApp, Instagram, and Snapchat were the main  
218 sources of information about novel coronavirus pandemic with 60.3% and 57.5% respectively,  
219 followed by World Health Organization (WHO) press release 41.6%, while 28.7%, 15.8%, and  
220 1.4% reported that they received their information from the news outlet, family and friends, and  
221 other sources, respectively as presented in Figure 3.

### 222 **Level of knowledge (K) and practice (P) as per socio-demographic characteristics of** 223 **participants**

224 The knowledge level score (out of 15) showed a significant association across socio-  
225 demographic characteristics such as gender, age, education levels, marital status, and  
226 employment status ( $p < 0.005$ ). The practice level score (out of 26) also showed a significant  
227 association between gender and age-groups ( $p < 0.005$ ) while there was no significant  
228 association between marital status ( $p = 0.061$ ), educational ( $p = 0.385$ ) and employment ( $p = 0.084$ )  
229 with the practice of the participants.

230 The results indicated that females had a higher mean score of knowledge ( $13.19 \pm 1.70$ ) and  
231 practice ( $21.85 \pm 2.61$ ) than males, aged group of participants above 50-years-old having the

232 highest score of knowledge ( $14.11 \pm 0.87$ ) and practice ( $22.50 \pm 2.32$ ) compared with other age  
233 groups. Moreover, widows and divorced women's knowledge ( $13.37 \pm 1.32$ ) were higher than  
234 singles and married participants; however, there were no significant differences in practice. The  
235 mean score of knowledge ( $13.26 \pm 1.51$ ) and practice ( $21.75 \pm 2.77$ ) of participants with high  
236 education degrees were better than participants with lower educational degrees. Employed  
237 respondents showed a higher-level score of knowledge ( $13.12 \pm 1.61$ ) than non-employed and  
238 students' participants. While there were no significant differences in employment status in  
239 practice, neither education levels nor employment status had any significant differences in  
240 practice, as depicted in table 3.

#### 241 **Binary logistic regression analysis**

242 Table 4 shows the binary logistic regression analysis on variables significantly correlated with  
243 knowledge and practice (good and poor) about 2019 novel coronavirus.

244 The Odds ratios (ORs) and their 95% confidence intervals (CIs) in a bid to quantify the  
245 relationship between socio-demographic characteristics and the knowledge score ( $>12$  and  $<12$ ),  
246 and between socio-demographic characteristics and the practices score ( $>21$  and  $<21$ ). Overall,  
247 the analysis presents a significant relationship between knowledge with age, marital status, and  
248 employment status. The same table shows that the age of  $\geq 50$  vs other ages reported better  
249 knowledge, divorced & widows vs. married and single participants were significantly related  
250 with a higher mean score, employed people were significantly related with the better knowledge  
251 vs unemployed and retired respondents ( $\beta$ : -1.790, OR: 0.167, CI: 0.103-.270). Moreover, gender,  
252 age, education and employment status were significantly associated with good practices. Female  
253 gender vs male ( $\beta$ : -0.458 OR: 0.633, CI 0.464-0.863), age group of  $\geq 50$  had higher practice  
254 score than the youngest group of 18-29 and 30-49 ( $\beta$ : -0.790, OR: 0.454, CI: 0.261-0.788), ( $\beta$ : -

255 0.890 OR: 0.411, CI: 0.266-0.635), respectively. However, participants with a college-level  
256 degree and below showed a better practice ( $\beta$  1.450 OR: 4.263, 95% CI: 2.206-8.236) than  
257 participants with a postgraduate degree, while, employment statuses of employed reported a better  
258 score than unemployed participants to ( $\beta$ : -1.215, OR: 0.297, CI: (0.158-0.558), as indicated in  
259 Table 4.

### 260 **3. DISCUSSION**

261  
262 The knowledge and practices of the public play an important role in prevention by following the  
263 health guidelines to control the spread of 2019-nCoV. The knowledge and practices of the  
264 general population about novel coronavirus have changed during the pandemic as a defense line  
265 against the disease.

266 The provided baseline data regarding the level of individuals' knowledge on clinical  
267 presentations, transmission, prevention, and risk factors of novel coronavirus virus will help  
268 highlight malpractices related to preventive measures hence making it critical for local  
269 authorities to plan suitable strategies to prepare and manage the spread of the virus.

270 The current study resulted that the participants' knowledge was high (86%) and had good  
271 measures of practice toward 2019 novel coronavirus (76%). Similar to our findings, several  
272 studies done in many countries have reported high levels of knowledge about novel coronavirus,  
273 among the general population in Malaysia 80.5%, Chinese residents 90%, Saudi Arabia  
274 population 81.5%, and among healthcare workers in Pakistan 93.2%. (14, 4, 15, 16).

275 The high level of knowledge among the public may be due to most of the participants having a  
276 college degree or higher, or due to the high level of media coverage, including all media outlets  
277 and the impact of the pandemic on social life mandating that people follow.

278 The current results showed that most of the participants depend more on the ministry of health  
279 and social media to get their information about the 2019 novel coronavirus, In contrast to other  
280 studies among Jordanian, Egyptian and Pakistani populations that were using mostly social  
281 media as the main source of information (17, 18, 19).

282 The study found that the majority of respondents had a good level in prevention and control  
283 measures toward novel coronavirus, indicating that the practices of some respondents were very  
284 good toward novel coronavirus. That the results reported on practice toward 2019-nCoV among  
285 the respondents were similar to those reported in the Malaysian population (14) while being less  
286 than the level of practices among Chinese residents (4).

287 This level of practice among the respondents attributed that the Iraqi government didn't take  
288 drastic measures in reducing the spread of the disease, in addition to the low number of cases in  
289 Mosul at the beginning of the pandemic (20).

290 Our results using t-tests, ANOVA and logistic regression analysis showed that there was better  
291 knowledge and accurate practices associated significantly with female gender, respondents above  
292 50 years old, employed respondents, higher education, and married respondents.

293 Females and mothers are expected to show better knowledge and practices towards the 2019  
294 novel coronavirus precautions and preventions. Similar studies in Malaysian and Saudi Arabia  
295 indicated that females had more knowledge regarding novel coronavirus than males (14, 15).

296 The high level of knowledge and practice among the participants that are above the age of 50 in  
297 our study is possibly due to understanding the higher risk of contraction and complications of the  
298 disease on the elderly and people with chronic diseases (21). In our study, the respondents that  
299 hold a higher degree level had a greater level of knowledge than the others. Similar findings

300 were reported within Malaysian and Pakistani university populations (14,19). A great majority of  
301 respondents confirmed that the novel coronavirus disease is more dangerous in patients with  
302 chronic diseases and the elderly. This has been confirmed from many studies published regarding  
303 the 2019 novel coronavirus disease in China (22, 23).

304 Our results reported that 17.5 % of the respondents had chronic diseases such as diabetes,  
305 asthma, and severe obesity were the common diseases among our participants. A similar study  
306 among Iraqi adults indicated that the common non-communicable diseases were hypertension  
307 (13.3%) and overweight or obese (54.6%). Another study showed that diabetes and hypertension  
308 were the most prevalent diseases among Iraqi people (24, 25).

309 Our results were compatible with many studies that showed similar significance in terms of  
310 better knowledge and practice among the educated and employed people. (4, 14, 15,26, 27).

311 Finally, the results indicated that more informative novel coronavirus efforts and more intense  
312 health education should be directed toward respondents with the following socio0demographic  
313 characteristics; male respondents, respondents with lower educational levels, younger  
314 respondents, and unmarried respondents.

### 315 **Limitations**

316 Since the study is a cross-sectional study, it was conducted within a short time during the  
317 pandemic. Moreover, this study was an online survey that expected that the people with a higher  
318 level of education would respond to the survey; as such, it doesn't give privilege to the  
319 uneducated population and those with limited access to the internet.

## 320 **4. CONCLUSIONS**

321 In general, the current study provided a comprehensive screening of the knowledge and  
322 practices of the population in Mosul city toward the 2019 novel coronavirus. The participants  
323 had a high level of knowledge about the virus, and good practice towards using protective  
324 measures, which is significant towards controlling the spread of the virus. The study  
325 recommends developing informative novel coronavirus related campaigns targeted specifically  
326 towards younger males, lower educated, and unemployed people were living in Mosul city.  
327 Furthermore, interventions that encourage the provision and use of free personal protective  
328 equipment (PPE) such as face mask should be developed as this will help curb the spreading of  
329 the virus. In the same vein, the Iraqi government should take more effort to control the spread of  
330 the disease.

331

### 332 **ACKNOWLEDGMENT**

333 The authors thank the University of Sharjah and respondents who agree to participate in the  
334 study. Also, we gratefully acknowledge Mr. Ahmed Omar Address - College of Medicine for the  
335 critical edition of English grammar.

336

### 337 **CONFLICTS OF INTEREST**

338 The authors declare no conflict of interest.

339

### 340 **FUNDING**

341 This research received no external funding

### 342 **AUTHOR CONTRIBUTIONS**

343 B.Q.S. Conceptualization, design of the study, data collection, resources, and wrote the paper,  
344 R.A contributed to the statistical analysis, and O.A.B Revise and edit the text, All authors have  
345 read and agreed to the published version of the manuscript.

346

347

348

349

350

351

352

353

## 354 REFERENCES

- 355 1. Bedford J, Enria, D, Giesecke J, Heymann DL, Ihekweazu C, Kobinger G. et al. COVID-  
356 19: towards controlling of a pandemic. The Lancet 2020; 395: 1015–1018.  
357 [https://doi.org/10.1016/S0140-6736\(20\)30673-5](https://doi.org/10.1016/S0140-6736(20)30673-5)
- 358 2. Centers for Disease Control and Prevention (CDC). Coronavirus Disease 2019 (COVID-  
359 19), [https://www.cdc.gov/media/dpk/diseases-and-conditions/coronavirus/coronavirus-](https://www.cdc.gov/media/dpk/diseases-and-conditions/coronavirus/coronavirus-2020.html)  
360 [2020.html](https://www.cdc.gov/media/dpk/diseases-and-conditions/coronavirus/coronavirus-2020.html) : 2020
- 361 3. World Health Organization (WHO). Coronavirus disease (COVID-19) pandemic,  
362 [https://www.who.int/emergencies/diseases/novel-coronavirus-](https://www.who.int/emergencies/diseases/novel-coronavirus-2019?gclid=Cj0KCQjwhIP6BRCMARIsALu9LfkmgQaE5XRz5j9cckkzQ2Yrb0Zj0pm27utG7cFS--zxdlxRnSAdlFDkaAvtJEALw_wcB)  
363 [2019?gclid=Cj0KCQjwhIP6BRCMARIsALu9LfkmgQaE5XRz5j9cckkzQ2Yrb0Zj0pm27ut](https://www.who.int/emergencies/diseases/novel-coronavirus-2019?gclid=Cj0KCQjwhIP6BRCMARIsALu9LfkmgQaE5XRz5j9cckkzQ2Yrb0Zj0pm27utG7cFS--zxdlxRnSAdlFDkaAvtJEALw_wcB)  
364 [G7cFS--zxdlxRnSAdlFDkaAvtJEALw\\_wcB](https://www.who.int/emergencies/diseases/novel-coronavirus-2019?gclid=Cj0KCQjwhIP6BRCMARIsALu9LfkmgQaE5XRz5j9cckkzQ2Yrb0Zj0pm27utG7cFS--zxdlxRnSAdlFDkaAvtJEALw_wcB): 2020
- 365 4. Zhong BL, Luo W, Li HM, Zhang QQ, Liu XG, Li WT, Li Y. Knowledge, attitudes, and  
366 practices towards COVID-19 among Chinese residents during the rapid rise period of the  
367 COVID-19 outbreak : a quick online cross-sectional survey. Int J Biol Sci 2020;16  
368 (10):1745-1752.
- 369 5. Habibzadeh P, Stoneman EK. The Novel Coronavirus: A Bird’s Eye View. The  
370 International Journal of Occupational and Environmental Medicine 2020;11(2):65–71.



- 371 6. OCHA. United nation office for the coordination of humanitarian affairs,  
372 <https://www.unocha.org/iraq>: 2020
- 373 7. Al-Malkey MK, Al-Sammak MA. Incidence of the COVID-19 in Iraq – Implications for  
374 travelers. *Travel Med Infect Dis* 2020; 13: 101739.
- 375 8. Mosul: MSF works on dual front of COVID-19 and lifesaving, <https://www.msf.org/mosul-iraq-msf-dual-front-covid-19-and-lifesaving-care>: 2020
- 376
- 377 9. Mikhael EM, Al-Jumaili AA. Can developing countries face novel coronavirus outbreak  
378 alone. *The Iraqi situation, Public Health in Practice* 2020; 1:100004.
- 379 10. World Health Organization (WHO). Novel Coronavirus (2019-nCoV) Advice for the  
380 Public, [https://www.who.int/emergencies/diseases/novel-coronavirus-2019/advice-for-](https://www.who.int/emergencies/diseases/novel-coronavirus-2019/advice-for-public)  
381 [public](https://www.who.int/emergencies/diseases/novel-coronavirus-2019/advice-for-public): 2020
- 382 11. World Health Organization (WHO). Novel Coronavirus (2019-nCoV) Advice for the  
383 Public, [https://www.who.int/emergencies/diseases/novel-coronavirus-2019/advice-for-](https://www.who.int/emergencies/diseases/novel-coronavirus-2019/advice-for-public)  
384 [public](https://www.who.int/emergencies/diseases/novel-coronavirus-2019/advice-for-public): 2020
- 385 12. CDC. Get the Facts About Coronavirus, [https://www.cdc.gov/coronavirus/2019-](https://www.cdc.gov/coronavirus/2019-ncov/index.html)  
386 [ncov/index.html](https://www.cdc.gov/coronavirus/2019-ncov/index.html): 2020
- 387 13. Conroy R. Sample size: a rough guide. Ethics (Medical Research) Committee,  
388 <http://www.beaumontethics.ie/docs/application/samplesizecalculation.pdf>: 2015
- 389 14. Israel GD. Determining the sample size. Gainesville: University of Florida; 1992. Report  
390 No. Fact Sheet PEOD-6.
- 391 15. Azlan AA, Hamzah MR, Sern TJ, Ayub SH, MohamadE. Public knowledge, attitudes and  
392 practices towards COVID-19: A cross-sectional study in Malaysia. *PLoS ONE* 2020; 15(5):  
393 e0233668
- 394 16. Al-Hanawi MK, Angawi K, Alshareef N, Qattan AMN, Helmy HZ, Abudawood Y,  
395 Alqurashi M, Kattan WM, Kadasah NA, Chirwa GC, Alsharqi O. Knowledge, Attitude and  
396 Practice Toward COVID-19 Among the Public in the Kingdom of Saudi Arabia: A Cross-  
397 Sectional Study. *Frontiers in Public, health* 2020; 8:217.
- 398
- 399 17. Saqlain M, Munir MM, Rehman BSU, Gulzar CA, Naz DS, Ahmed EZ, Tahir FAH,  
400 Mashhoodg AM. Knowledge, attitude, practice and perceived barriers among healthcare  
401 workers regarding COVID-19: a cross-sectional survey from Pakistan. *J Hosp Infect* 2020;  
402 105(3): 419–423.

- 403  
404 18. Khasawneh AI, Humeidan AA, Alsulaiman JW, Bloukh S, Ramadan M, Al-Shatanawi TN,  
405 Awad HH, Hijazi WY, Al-Kammash KR, Obeidat N, Saleh T. and Kheirallah KA. Medical  
406 Students and COVID-19: Knowledge, Attitudes, and Precautionary Measures. A  
407 Descriptive Study from Jordan. *Frontiers in Public Health* 2020; 8:253.
- 408  
409 19. Abdelhafz AS, Mohammed Z, Ibrahim ME, Ziady HH, Alorabi M, Ayyad M, Sultan EA.  
410 Knowledge, Perceptions, and Attitude of Egyptians Towards the Novel Coronavirus  
411 Disease (COVID-19). *Journal of Community Health* 2020; 45:881–890
- 412  
413 20. Salman M, Mustafa ZU, Asif N, Zaidi HA, Hussain K, Shehzadi N, Khan TM, Saleem Z.  
414 Knowledge, attitude, and preventive practices related to COVID-19: a cross-sectional  
415 study in two Pakistani university populations. *Drugs & Therapy Perspectives* 2020; 36:319–  
416 325
- 417  
418 21. Revitalising the commercial activities in the country and to ease the burden on the workers,  
419 [https://www.thenational.ae/world/mena/coronavirus-iraq-eases-restrictions-despite-lack-of-](https://www.thenational.ae/world/mena/coronavirus-iraq-eases-restrictions-despite-lack-of-respite-from-covid-19-1.1051563)  
420 [respite-from-covid-19-1.1051563](https://www.thenational.ae/world/mena/coronavirus-iraq-eases-restrictions-despite-lack-of-respite-from-covid-19-1.1051563): 2020
- 421  
422 22. Cao J, Hu X, Cheng W, Yu L, Tu W-J, Liu Q. Letter to the editor: clinical features and  
423 short-term outcomes of 18 patients with coronavirus disease 2019 in intensive care unit.  
424 *Intensive Care Med* 2020, <https://doi.org/10.1007/s00134-020-05987-7>
- 425  
426 23. Li, LQ, Huang, T, Wang YQ, Wang ZP, Liang Y, Huang TB, Zhang HY, Sun W, Wang Y.  
427 COVID-19 patients' clinical characteristics, discharge rate, and fatality rate of  
428 meta-analysis. *Journal of Medical Virology* 2020; 1–7.
- 429  
430 24. Liang W, Guan W, Chen R, Wang W, Li J, Xu K. et al. Cancer patients in SARS-CoV-2  
431 infection: A nationwide analysis in China. *The Lancet Oncology* 2020; 21(3):335–337.
- 432  
433 25. Yun K, Hebrank K, Graber L K, Sullivan M C, Chen I, Gupta J. High Prevalence of  
434 Chronic Non-Communicable Conditions Among Adult Refugees. *J Community Health*  
435 2012; 37(5):1110-1118.
- 436

- 437 26. Hussain A, Lafta RK. Burden of non-communicable diseases in Iraq after the 2003 war.  
438 Saudi medical journal 2019; 40(1):72-78  
439  
440 27. Rugarabamu S, Ibrahim M, Byanaku A. Knowledge, attitudes, and practices (KAP) towards  
441 COVID-19: A quick online cross-sectional survey among Tanzanian residents. medRxiv  
442 preprint2020; doi: <https://doi.org/10.1101/2020.04.26.20080820.t>  
443  
444 28. Hager E, Odetokun IA, Bolarinwa O, Zainab A, Okechukwu O, Al-Mustapha AI.  
445 Knowledge, attitude, and perceptions towards the 2019 Coronavirus Pandemic: A bi-  
446 national survey in Africa. PloS one. 2020;15(7): e0236918.

447

448

449

450

451

452 **TABLES AND FIGURES:**

453

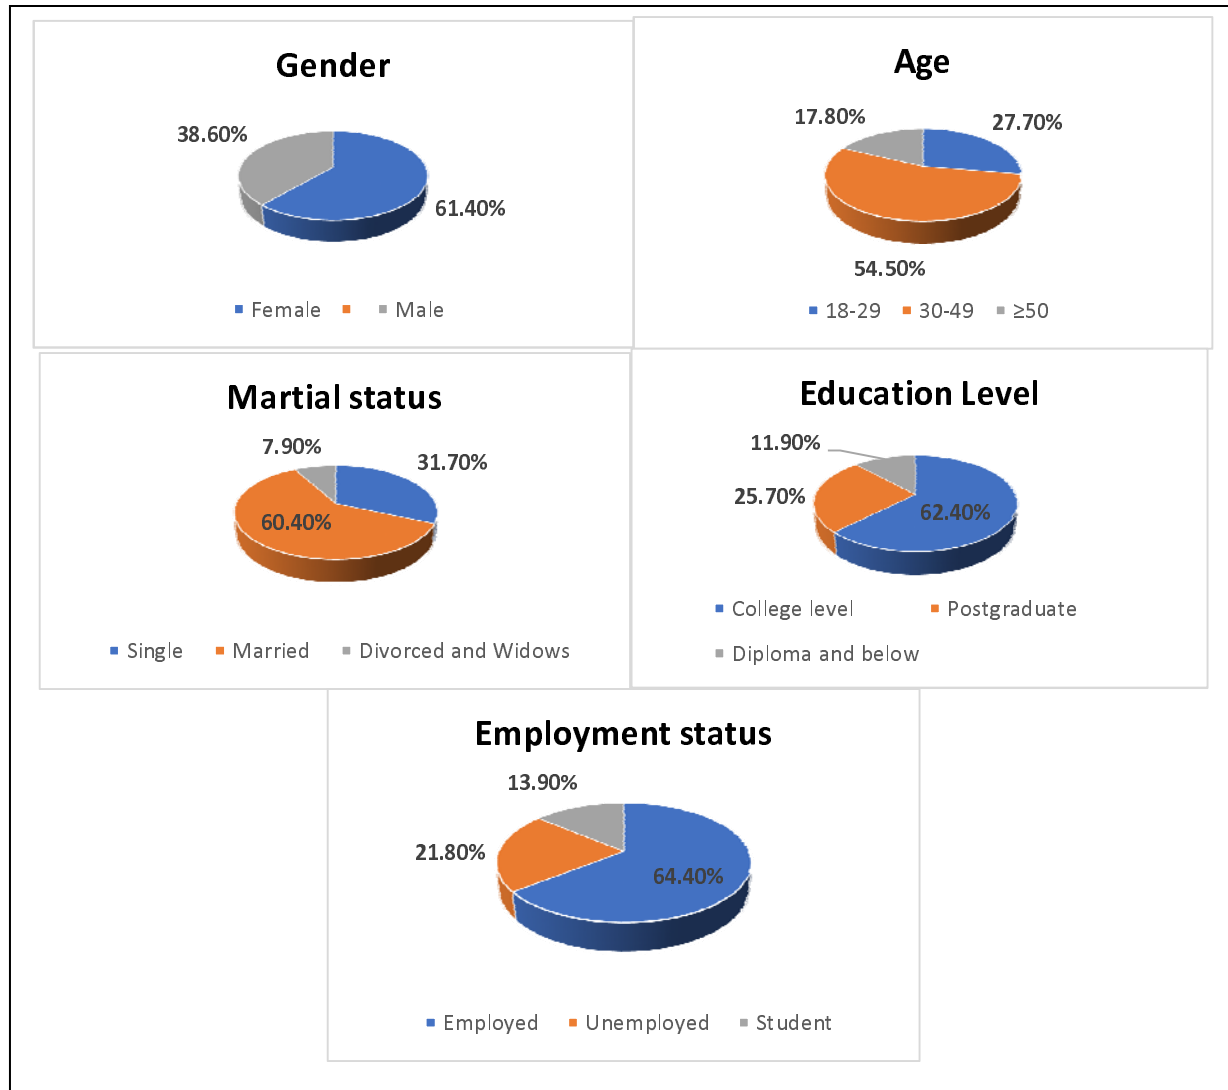

454 **Fig. 1.** Socio-demographic characteristics of the participants Mosul, Iraq (n = 909).

455

456

457

458

459

460

461

462

463

464 **Figure. 2.:** Prevalence of chronic diseases reported by people in the Mosul, Iraq (n = 909)

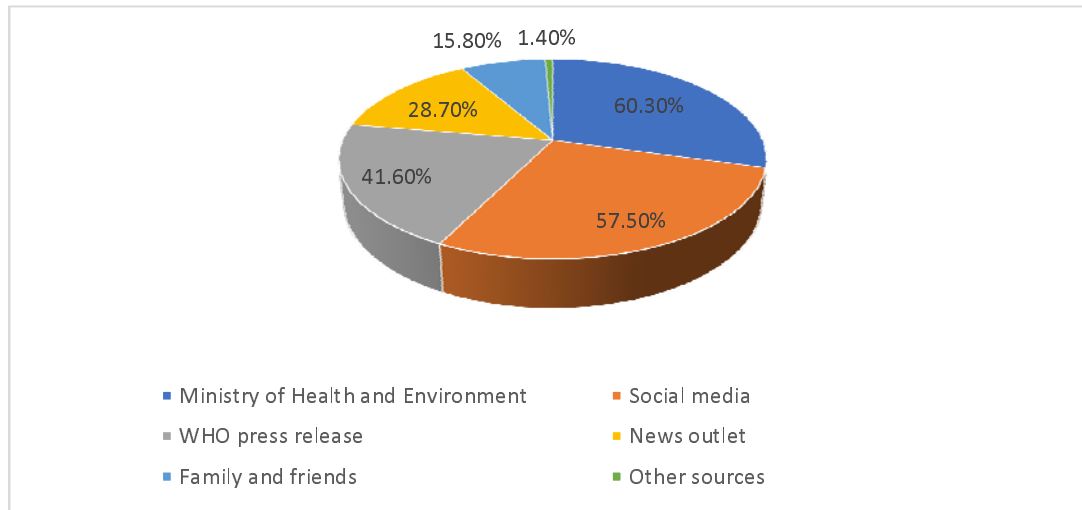

465

466

467

468 **Table 1.** General knowledge of participants about novel coronavirus in Mosul, Iraq (n= 909)

| Knowledge questions                                                                                             |          | Frequency (%)     | MEAN±SD      |
|-----------------------------------------------------------------------------------------------------------------|----------|-------------------|--------------|
| K:1 Novel coronavirus is caused by virus                                                                        | Yes      | <b>837 (92.1)</b> | 1.13 ±0.460  |
|                                                                                                                 | No       | 27 (3.0)          |              |
|                                                                                                                 | Not sure | 45 (5.0)          |              |
| K:2 Incubation period range of novel coronavirus is 2-14 day                                                    | Yes      | <b>855 (94.1)</b> | 1.07 ±0.291  |
|                                                                                                                 | No       | 45 (5.0)          |              |
|                                                                                                                 | Not sure | 9 (1.0)           |              |
| K3: The main clinical symptoms of Novel coronavirus are fever, dry cough, tiredness, and breathing difficulties | Yes      | <b>873 (96.0)</b> | 1.08 ± 0.390 |
|                                                                                                                 | No       | 0(0)              |              |
|                                                                                                                 | Not sure | 36 (4.0)          |              |
| K4: No vaccine against novel coronavirus                                                                        | Yes      | <b>657 (72.3)</b> | 2.10 ±0.517  |
|                                                                                                                 | No       | 81 (8.9)          |              |
|                                                                                                                 | Not sure | 171 (18.8)        |              |
| K5: No active treatment for novel coronavirus                                                                   | Yes      | <b>576 (63.4)</b> | 2.23 ±0.561  |
|                                                                                                                 | No       | 63 (6.9)          |              |
|                                                                                                                 | Not sure | 270 (29.7)        |              |
| K6: Novel coronavirus spreads via respiratory droplets of infected people                                       | Yes      | <b>846 (93.1)</b> | 1.13 ±0.481  |
|                                                                                                                 | No       | 9 (1)             |              |
|                                                                                                                 | Not sure | 54 (5.9)          |              |

|                                                                                                                                |            |                   |             |
|--------------------------------------------------------------------------------------------------------------------------------|------------|-------------------|-------------|
| K7: Novel coronavirus is spread through touching contaminated surfaces                                                         | <b>Yes</b> | <b>846 (93.1)</b> | 1.13 ±0.481 |
|                                                                                                                                | No         | 9 (1)             |             |
|                                                                                                                                | Not sure   | 54 (5.9)          |             |
| K8: Novel coronavirus can be transmitted through eyes, in addition to nose and mouth                                           | <b>Yes</b> | <b>747 (82.2)</b> | 1.24 ±0.548 |
|                                                                                                                                | No         | 108 (11.9)        |             |
|                                                                                                                                | Not sure   | 54 (5.9)          |             |
| K9: A person with novel coronavirus having no fever cannot infect others                                                       | <b>Yes</b> | <b>162 (17.8)</b> | 2.05 ±0.636 |
|                                                                                                                                | No         | 540 (59.4)        |             |
|                                                                                                                                | Not sure   | 207 (22.8)        |             |
| K10: Children and young adults don't need to take measures to prevent the infection by the novel coronavirus                   | <b>Yes</b> | <b>18 (2)</b>     | 2.02 ±0.243 |
|                                                                                                                                | No         | 855 (94.1)        |             |
|                                                                                                                                | Not sure   | 36 (4)            |             |
| K11: We should stay at home and go out only when it is necessary                                                               | <b>Yes</b> | <b>693 (76.2)</b> | 1.48 ±0.852 |
|                                                                                                                                | No         | 216 (23.8)        |             |
|                                                                                                                                | Not sure   | 0 (0)             |             |
| K12: To prevent the spread of novel coronavirus, individuals should avoid going to crowded places if it's not necessary        | <b>Yes</b> | <b>909 (100)</b>  | 1.00 ±0.00  |
|                                                                                                                                | No         | 0(0)              |             |
|                                                                                                                                | Not sure   | 0(0)              |             |
| K13: The novel coronavirus may be more dangerous in patients with chronic diseases and elderly                                 | <b>Yes</b> | <b>873 (96)</b>   | 1.07 ±0.352 |
|                                                                                                                                | No         | 9 (1)             |             |
|                                                                                                                                | Not sure   | 27 (3)            |             |
| K14: People who have contact with someone infected with the novel coronavirus should be immediately isolated in a proper place | <b>Yes</b> | <b>909 (100)</b>  | 1.00 ±0.00  |
|                                                                                                                                | No         | 0(0)              |             |
|                                                                                                                                | Not sure   | 0(0)              |             |
| K15: Smokers are likely to be more vulnerable to novel coronavirus                                                             | <b>Yes</b> | <b>720 (79.2)</b> | 1.31 ±0.641 |
|                                                                                                                                | No         | 99 (10.9)         |             |
|                                                                                                                                | Not sure   | 90 (9.9)          |             |
| <b>Total knowledge level</b>                                                                                                   |            | <b>86.08%</b>     |             |

469

470 **Table 2.** Practices of participants toward novel coronavirus in Mosul, Iraq (n= 909)

| <b>Practice questions</b> | <b>Frequency (%)</b> | <b>MEAN±SD</b> |
|---------------------------|----------------------|----------------|
|---------------------------|----------------------|----------------|

It is made available under a [CC-BY 4.0 International license](https://creativecommons.org/licenses/by/4.0/) .

|                                                                           |          |            |             |
|---------------------------------------------------------------------------|----------|------------|-------------|
| P1: Have you started to wash or sanitize your hands regularly?            | Always   | 837 (92.1) | 1.16 ±0.540 |
|                                                                           | Sometime | 72 (7.9)   |             |
|                                                                           | Never    | 0 (0)      |             |
| P2: Have you washing your hands for 20 Sec or more?                       | Always   | 702 (77.2) | 1.38 ±0.807 |
|                                                                           | Sometime | 0 (0.0)    |             |
|                                                                           | Never    | 207 (22.8) |             |
| P3: Do you use sanitizer if the soap is not available                     | Always   | 837 (92.1) | 1.13 ±0.501 |
|                                                                           | Sometime | 0 (0.0)    |             |
|                                                                           | Never    | 72 (8)     |             |
| P4: Do you wear a mask when you go outside?                               | Always   | 756 (83.2) | 1.32 ±0.717 |
|                                                                           | Sometime | 135 (14.9) |             |
|                                                                           | Never    | 18 (2.0)   |             |
| P:5 Do you keep distance between you and others when you go outside?      | Always   | 657 (72.3) | 1.55 ±0.896 |
|                                                                           | Sometime | 0 (0)      |             |
|                                                                           | Never    | 252 (27.7) |             |
| P6: Do you keep 2 meters distance between you and others?                 | Always   | 333 (36.6) | 1.82 ±0.814 |
|                                                                           | Sometime | 45 (5.0)   |             |
|                                                                           | Never    | 531(58.4)  |             |
| P7: Did you stop going to crowded places recently?                        | Always   | 801 (88.1) | 1.22 ±0.607 |
|                                                                           | Sometime | 90 (9.9)   |             |
|                                                                           | Never    | 18 (2.0)   |             |
| P8: Did you stop visiting your relatives and friends during the outbreak? | Always   | 630 (69.3) | 1.51 ±0.816 |
|                                                                           | Sometime | 189 (20.8) |             |
|                                                                           | Never    | 90 (9.9)   |             |
| P9: Did you stop kissing your relatives and friends when you meet them?   | Always   | 594 (65.3) | 1.62 ±0.889 |
|                                                                           | Sometime | 252 (27.7) |             |
|                                                                           | Never    | 63 (6.9)   |             |
| P10: Did you stop handshaking with others?                                | Always   | 702 (77.2) | 1.45 ±0.827 |
|                                                                           | Sometime | 198 (21.8) |             |
|                                                                           | Never    | 9 (1.0)    |             |
| P11: Do you wash or sterilize your hands after dealing with cash?         | Always   | 738 (81.2) | 1.31 ±0.671 |
|                                                                           | Sometime | 108 (11.9) |             |
|                                                                           | Never    | 63 (6.9)   |             |
| P12: Did you stop sharing your eating utensils and food with others?      | Always   | 684 (75.2) | 1.41 ±0.747 |
|                                                                           | Sometime | 144 (15.8) |             |
|                                                                           | Never    | 81 (8.9)   |             |
| P13: Do you follow regular updates on Novel coronavirus?                  | Always   | 693 (76.2) | 1.45 ±0.815 |
|                                                                           | Sometime | 189 (20.8) |             |
|                                                                           | Never    | 27 (3.0)   |             |

---

**Total practices level**

**75.84%**

---

471

472

473

474  
475  
476  
477  
478  
479  
480  
481  
482

483 **Table 3.** Association between socio-demographic characteristics with knowledge (K) and  
484 practices (P) of participants.

| <b>Knowledge of participants</b> |                     |                      |                |            |                |
|----------------------------------|---------------------|----------------------|----------------|------------|----------------|
| <b>Variables</b>                 |                     | <b>Frequency (%)</b> | <b>MEAN±SD</b> | <b>t/F</b> | <b>P-value</b> |
| Gender                           | Female              | 558 (61.4%)          | 13.19±1.70     | 6.57       | 0.000          |
|                                  | Male                | 351 (38.6%)          | 12.46±1.51     |            |                |
| Age                              | 18-29               | 252 (27.7%)          | 12.35±1.63     | 64.54      | 0.000          |
|                                  | 30-49               | 495 (54.5%)          | 12.80±1.70     |            |                |
|                                  | ≥ 50                | 162 (17.8%)          | 14.11±0.87     |            |                |
| Marital status                   | Single              | 288 (31.7%)          | 12.40±1.47     | 20.83      | 0.000          |
|                                  | Married             | 549 (60.4%)          | 13.11±1.74     |            |                |
|                                  | Others              | 72 (7.9%)            | 13.37±1.32     |            |                |
| Education level                  | College degree      | 567 (62.4%)          | 12.84±1.62     | 9.28       | 0.000          |
|                                  | Postgraduate degree | 234 (25.7%)          | 13.26±1.51     |            |                |
|                                  | Others              | 108(11.9%)           | 12.50±2.07     |            |                |
| Employment status                | Employed            | 585 (64.4%)          | 13.12±1.61     | 17.44      | 0.000          |
|                                  | Unemployed          | 198 (21.8%)          | 12.72±1.93     |            |                |
|                                  | Student             | 126 (13.9%)          | 12.21±1.21     |            |                |
| <b>Practices of participants</b> |                     |                      |                |            |                |
| <b>Variables</b>                 |                     | <b>Frequency (%)</b> | <b>MEAN±SD</b> | <b>t/F</b> | <b>P-value</b> |
| Gender                           | Female              | 558 (61.4%)          | 21.85±2.61     | 3.8        | 0.000          |
|                                  | Male                | 351 (38.6%)          | 21.1±3.31      |            |                |
| Age                              | 18-29               | 252 (27.7%)          | 21.64 ±2.89    | 12.14      | 0.000          |
|                                  | 30-49               | 495 (54.5%)          | 21.21±3.04     |            |                |
|                                  | ≥ 50                | 162 (17.8%)          | 22.50±2.32     |            |                |
| Marital status                   | Single              | 288 (31.7%)          | 21.87 ±2.87    | 2.80       | 0.061          |
|                                  | Married             | 549 (60.4%)          | 21.45 ±2.99    |            |                |
|                                  | Others              | 72 (7.9%)            | 21.12 ±2.48    |            |                |



|                   |                     |             |             |       |       |
|-------------------|---------------------|-------------|-------------|-------|-------|
| Education level   | College degree      | 567 (62.4%) | 21.4 ± 3.07 | 0.955 | 0.385 |
|                   | Postgraduate degree | 234 (25.7%) | 21.75 ±2.77 |       |       |
|                   | Others              | 108(11.9%)  | 21.73 ±2.36 |       |       |
| Employment status | Employed            | 585 (64.4%) | 21.63±2.96  | 2.48  | 0.084 |
|                   | Unemployed          | 198 (21.8%) | 21.18±2.92  |       |       |
|                   | Student             | 126 (13.9%) | 21.85±2.67  |       |       |

485 **Table 4:** Binary logistic regression analysis on factors significantly associated with mean knowledge and  
486 practices about novel coronavirus of the participants, Mosul-Iraq

| <b>Knowledge (&gt; 12 and &lt; 12)</b>                   |          |                     |                |
|----------------------------------------------------------|----------|---------------------|----------------|
| <b>Variable</b>                                          | <b>β</b> | <b>OR (CI 95%)</b>  | <b>P-value</b> |
| Age (≥ 50 vs. 18-29)                                     | -        | -                   | 0.001*         |
| Age (≥ 50 vs. 30-49)                                     | -        | -                   | 0.036*         |
| Marital status (others vs. married and single)           | -        | -                   | 0.000*         |
| Employment status (employed vs. unemployed and students) | -        | -                   | 0.000*         |
| Employment status (unemployed vs. employed)              | -1.79    | 0.167(0.103-0.270)  | 0.000*         |
| <b>Practice (&gt; 21 and &lt; 21)</b>                    |          |                     |                |
| <b>Variable</b>                                          | <b>β</b> | <b>OR (CI 95%)</b>  | <b>P-value</b> |
| Gender (male vs. female)                                 | -0.458   | 0.633 (0.464-0.863) | 0.004*         |
| Age (18-29 vs. ≥50)                                      | -0.790   | 0.454 (0.261-0.788) | 0.005*         |
| Age (30-49 vs. ≥50)                                      | -0.890   | 0.411 (0.266-0.635) | 0.000*         |
| Education level (others level vs. postgraduate)          | 1.450    | 4.263 (2.206-8.236) | 0.000*         |
| Employment status (unemployed vs. employed)              | -1.215   | 0.297 (0.158-0.558) | 0.006*         |

487

488

489

490

491
